# Supplementary material for: Optimization of Docetaxel Loading Conditions in Liposomes: proposing potential products for metastatic breast carcinoma chemotherapy
Source: PubMed Central journal article supplement (PMC7101339; doi:10.1038/s41598-020-62501-1), 2020-03-27
Supplement: 41598_2020_62501_MOESM1_ESM.pdf [file 41598_2020_62501_MOESM1_ESM.pdf]

# Optimization of Docetaxel Loading Conditions in Liposomes: proposing potential products for metastatic breast carcinoma chemotherapy

Roghayyeh Vakili-Ghartavol<sup>1</sup>, Seyed Mahdi Rezayat<sup>1,2</sup>, Reza Faridi-Majidi<sup>1</sup>, Kayvan Sadri<sup>3</sup>, Mahmoud Reza Jaafari<sup>\*4,5</sup>

\*Corresponding author: Mahmoud Reza Jaafari; Email: Jafarimr@mums.ac.ir

<sup>1</sup>Department of Medical Nanotechnology, School of Advanced Technologies in Medicine, Tehran University of Medical Sciences, Tehran, Iran.

<sup>2</sup>Department of Pharmacology, School of Medicine, Tehran University of Medical Sciences, Tehran, Iran.

<sup>3</sup>Nuclear Medicine Research Center, Mashhad University of Medical Sciences, Mashhad 98451-3546, Iran

<sup>4</sup>Nanotechnology Research Center, Pharmaceutical Technology Institute, Mashhad University of Medical Sciences, Mashhad, Iran

<sup>5</sup>Department of Pharmaceutical Nanotechnology, School of Pharmacy, Mashhad University of Medical Sciences, Mashhad, Iran

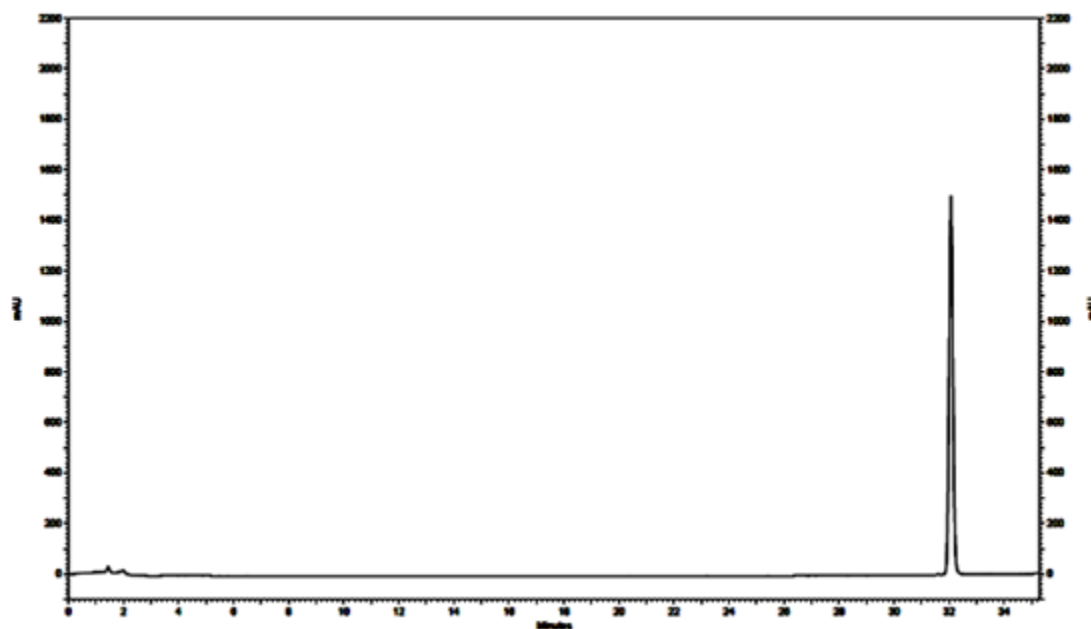

**Supplementary Figure S1.** A representative chromatogram of DTX obtained from HPLC equipped with a Waters C18, 3.5  $\mu\text{m}$ , 150  $\times$  4.6 mm, 100 $\text{\AA}$  column and an UV detector set at 230 nm.
