# Supplementary material for: Optimization of Docetaxel Loading Conditions in Liposomes: proposing potential products for metastatic breast carcinoma chemotherapy
Source: PubMed Central journal article supplement (PMC7101339; doi:10.1038/s41598-020-62501-1), 2020-03-27
Supplement: 41598_2020_62501_MOESM3_ESM.pdf [file 41598_2020_62501_MOESM3_ESM.pdf]

# Optimization of Docetaxel Loading Conditions in Liposomes: proposing potential products for metastatic breast carcinoma chemotherapy

Roghayyeh Vakili-Ghartavol<sup>1</sup>, Seyed Mahdi Rezayat<sup>1,2</sup>, Reza Faridi-Majidi<sup>1</sup>, Kayvan Sadri<sup>3</sup>, Mahmoud Reza Jaafari<sup>\*4,5</sup>

\*Corresponding author: Mahmoud Reza Jaafari; Email: Jafarimr@mums.ac.ir

<sup>1</sup>Department of Medical Nanotechnology, School of Advanced Technologies in Medicine, Tehran University of Medical Sciences, Tehran, Iran.

<sup>2</sup>Department of Pharmacology, School of Medicine, Tehran University of Medical Sciences, Tehran, Iran.

<sup>3</sup>Nuclear Medicine Research Center, Mashhad University of Medical Sciences, Mashhad 98451-3546, Iran

<sup>4</sup>Nanotechnology Research Center, Pharmaceutical Technology Institute, Mashhad University of Medical Sciences, Mashhad, Iran

<sup>5</sup>Department of Pharmaceutical Nanotechnology, School of Pharmacy, Mashhad University of Medical Sciences, Mashhad, Iran

## Supplementary Table S1

Determination of docetaxel solubility in hydration buffer (mannitol and acetic acid), dialysis buffer (dextrose 5%), and water.

| Docetaxel Concentrations in the prepared Solutions (mg/ml) | Concentration of Docetaxel After Filtration (µg/ml) |             |       |
|------------------------------------------------------------|-----------------------------------------------------|-------------|-------|
|                                                            | Mannitol and Acetic Acid                            | Dextrose 5% | Water |
| 1 mg Docetaxel/ Solution                                   | 13.7                                                | 12.9        | 21.7  |
| 2 mg Docetaxel/ Solution                                   | 8.7                                                 | 12.24       | 11.4  |
