# Supplementary material for: Optimization of Docetaxel Loading Conditions in Liposomes: proposing potential products for metastatic breast carcinoma chemotherapy
Source: PubMed Central journal article supplement (PMC7101339; doi:10.1038/s41598-020-62501-1), 2020-03-27
Supplement: 41598_2020_62501_MOESM4_ESM.pdf [file 41598_2020_62501_MOESM4_ESM.pdf]

# Optimization of Docetaxel Loading Conditions in Liposomes: proposing potential products for metastatic breast carcinoma chemotherapy

Roghayyeh Vakili-Ghartavol<sup>1</sup>, Seyed Mahdi Rezayat<sup>1,2</sup>, Reza Faridi-Majidi<sup>1</sup>, Kayvan Sadri<sup>3</sup>, Mahmoud Reza Jaafari\*<sup>4,5</sup>

\*Corresponding author: Mahmoud Reza Jaafari; Email: Jafarimr@mums.ac.ir

<sup>1</sup>Department of Medical Nanotechnology, School of Advanced Technologies in Medicine, Tehran University of Medical Sciences, Tehran, Iran.

<sup>2</sup>Department of Pharmacology, School of Medicine, Tehran University of Medical Sciences, Tehran, Iran.

<sup>3</sup>Nuclear Medicine Research Center, Mashhad University of Medical Sciences, Mashhad 98451-3546, Iran

<sup>4</sup>Nanotechnology Research Center, Pharmaceutical Technology Institute, Mashhad University of Medical Sciences, Mashhad, Iran

<sup>5</sup>Department of Pharmaceutical Nanotechnology, School of Pharmacy, Mashhad University of Medical Sciences, Mashhad, Iran

## Supplementary Table S2A

Optimization of important parameters involved in encapsulation efficacy of DTX into the HSPC/ DSPG/ DSPE-mPEG 2000/ Chol formulation.

| Incubation Time | Molar Ratio of Cholesterol (%) | Incubation Temperature (°C) | Encapsulation Efficacy (%) |
|-----------------|--------------------------------|-----------------------------|----------------------------|
| 2 (h)           | 50                             | 67                          | 0                          |
| 2 (h)           | 45                             | 67                          | 5                          |
| 2 (h)           | 40                             | 67                          | 10                         |
| 2 (h)           | 35                             | 67                          | 30                         |
| 2 (h)           | 30                             | 67                          | 40                         |
| 2 (h)           | 20                             | 67                          | 100                        |
| 2 (h)           | 15                             | 67                          | 86                         |
| 2 (h)           | 10                             | 67                          | 67                         |
| 5 (min)         | 20                             | 67                          | 2                          |
| 10 (min)        | 20                             | 67                          | 4                          |
| 20 (min)        | 20                             | 67                          | 10                         |
| 30 (min)        | 20                             | 67                          | 10                         |
| 40 (min)        | 20                             | 67                          | 10                         |
| 50 (min)        | 20                             | 67                          | 30                         |
| 1 (h)           | 20                             | 67                          | 40                         |
| 1.5 (h)         | 20                             | 67                          | 60                         |
| 2 (h)           | 20                             | 67                          | 100                        |
| 2 (h)           | 20                             | 50                          | 2                          |
| 2 (h)           | 20                             | 55                          | 5                          |
| 2 (h)           | 20                             | 57                          | 5                          |
| 2 (h)           | 20                             | 60                          | 10                         |
| 2 (h)           | 20                             | 63                          | 15                         |
| 2 (h)           | 20                             | 65                          | 17                         |
| 2 (h)           | 20                             | 66                          | 30                         |
| 2 (h)           | 20                             | 67                          | 100                        |
| 2 (h)           | 20                             | 68                          | 100                        |
