# Supplementary material for: Optimization of Docetaxel Loading Conditions in Liposomes: proposing potential products for metastatic breast carcinoma chemotherapy
Source: PubMed Central journal article supplement (PMC7101339; doi:10.1038/s41598-020-62501-1), 2020-03-27
Supplement: 41598_2020_62501_MOESM5_ESM.pdf [file 41598_2020_62501_MOESM5_ESM.pdf]

# Optimization of Docetaxel Loading Conditions in Liposomes: proposing potential products for metastatic breast carcinoma chemotherapy

Roghayyeh Vakili-Ghartavol<sup>1</sup>, Seyed Mahdi Rezayat<sup>1,2</sup>, Reza Faridi-Majidi<sup>1</sup>, Kayvan Sadri<sup>3</sup>, Mahmoud Reza Jaafari\*<sup>4,5</sup>

\*Corresponding author: Mahmoud Reza Jaafari; Email: Jafarimr@mums.ac.ir

<sup>1</sup>Department of Medical Nanotechnology, School of Advanced Technologies in Medicine, Tehran University of Medical Sciences, Tehran, Iran.

<sup>2</sup>Department of Pharmacology, School of Medicine, Tehran University of Medical Sciences, Tehran, Iran.

<sup>3</sup>Nuclear Medicine Research Center, Mashhad University of Medical Sciences, Mashhad 98451-3546, Iran

<sup>4</sup>Nanotechnology Research Center, Pharmaceutical Technology Institute, Mashhad University of Medical Sciences, Mashhad, Iran

<sup>5</sup>Department of Pharmaceutical Nanotechnology, School of Pharmacy, Mashhad University of Medical Sciences, Mashhad, Iran

## Supplementary Table S2B

Characteristics of DTX loaded liposomal formulations prepared based on different methods.

| No | Preparation Method | Formulations -Hydration Buffer                                                    | Z Average <sup>c</sup> (nm) | PDI <sup>d</sup> | Zeta potential (mV) | EE <sup>e</sup> (%) |
|----|--------------------|-----------------------------------------------------------------------------------|-----------------------------|------------------|---------------------|---------------------|
| 1  | Passive Loading    | HSPC/mPEG 2000-DSPE/ Chol, (8.5/0.5/1) -Mannitol 290 mM, Acetic acid 10mM         | 125                         | 0.087            | -10.3               | 20                  |
| 2  | Passive Loading    | HSPC/mPEG2000-DSPE/DPPG/Chol (85/5/5/10) -Mannitol 290 mM, Acetic acid 10mM       | 139.0                       | 0.156            | -10.9               | 18                  |
| 3  | Passive Loading    | HSPC/mPEG2000-DSPE/DSPG/Chol (85/5/5/10) -Mannitol 290 mM, Acetic acid 10mM       | 108.4                       | 0.178            | -13.7               | 26                  |
| 4  | Remote Loading     | HSPC/ mPEG 2000-DSPE/Chol, (8.5/0.5/1) -Sucrose 10%, HEPES 10 mM                  | 110                         | 0.121            | -9.32               | 23                  |
| 5  | Remote Loading     | HSPC/ mPEG 2000-DSPE/ Chol, (8.5/0.5/1) -mannitol 290 mM, succinate sodium 10 mM  | 109.5                       | 0.157            | -10.6               | 16.6                |
| 6  | Remote Loading     | HSPC/ mPEG 2000-DSPE/ Chol, (8.5/0.5/1) -mannitol 290 mM, acetic acid 10 mM       | 113.5                       | 0.152            | -8.52               | 67                  |
| 7  | Remote Loading     | HSPC/ mPEG 2000-DSPE/ Chol, (7.5/0.5/2) - mannitol 290 mM, acetic acid 10 mM      | 109.6±8                     | 0.165            | -10.8               | 20                  |
| 8  | Remote Loading     | HSPC/mPEG2000-DSPE/DSPG:Chol, (8/0.5/0.5/1) - mannitol 290 mM, acetic acid 10 mM  | 113.1±5                     | 0.145            | -12.1               | 71.8                |
| 9  | Remote Loading     | HSPC/mPEG 2000-DSPE/DPPG/Chol, (8/0.5/0.5/1) - mannitol 290 mM, acetic acid 10 mM | 118.1±10                    | 0.198            | -13.8               | 40.6                |
| 10 | Remote             | HSPC/ mPEG 2000-DSPE/Chol, (6/0.5/3.5)-                                           | - <sup>f</sup>              | -                | -                   | 10                  |

|           | Loading        | mannitol 290 mM, acetic acid 10 mM                                                   |   |   |   |    |
|-----------|----------------|--------------------------------------------------------------------------------------|---|---|---|----|
| <b>11</b> | Remote Loading | HSPC/mPEG2000-DSPE/DSPG/Chol, (5.5/0.5/0.5/3.5) -mannitol 290 mM, acetic acid 10 mM  | - | - | - | 10 |
| <b>12</b> | Remote Loading | HSPC/mPEG 2000-DSPE/DPPG/Chol, (5.5/0.5/0.5/3.5) -mannitol 290 mM, acetic acid 10 mM | - | - | - | 10 |

<sup>a</sup> Hydration buffer

<sup>b</sup> Dialysis buffer

<sup>c</sup> Values are presented from triplicate measurements of each formulation

<sup>d</sup> Poly dispersity index

<sup>e</sup> Encapsulation efficiency

<sup>f</sup> Values were not measured because of low EE
