# Supplementary material for: Optimization of Docetaxel Loading Conditions in Liposomes: proposing potential products for metastatic breast carcinoma chemotherapy
Source: PubMed Central journal article supplement (PMC7101339; doi:10.1038/s41598-020-62501-1), 2020-03-27
Supplement: 41598_2020_62501_MOESM7_ESM.pdf [file 41598_2020_62501_MOESM7_ESM.pdf]

## Optimization of Docetaxel Loading Conditions in Liposomes: proposing potential products for metastatic breast carcinoma chemotherapy

Roghayyeh Vakili-Ghartavol<sup>1</sup>, Seyed Mahdi Rezayat<sup>1,2</sup>, Reza Faridi-Majidi<sup>1</sup>, Kayvan Sadri<sup>3</sup>, Mahmoud Reza Jaafari\*<sup>4,5</sup>

\*Corresponding author: Mahmoud Reza Jaafari; Email: Jafarimr@mums.ac.ir

<sup>1</sup>Department of Medical Nanotechnology, School of Advanced Technologies in Medicine, Tehran University of Medical Sciences, Tehran, Iran.

<sup>2</sup>Department of Pharmacology, School of Medicine, Tehran University of Medical Sciences, Tehran, Iran.

<sup>3</sup>Nuclear Medicine Research Center, Mashhad University of Medical Sciences, Mashhad 98451-3546, Iran

<sup>4</sup>Nanotechnology Research Center, Pharmaceutical Technology Institute, Mashhad University of Medical Sciences, Mashhad, Iran

<sup>5</sup>Department of Pharmaceutical Nanotechnology, School of Pharmacy, Mashhad University of Medical Sciences, Mashhad, Iran

### Supplementary Table S4

DTX concentrations and correspond Area Under the DTX concentration – time Curves (AUC) obtained from HPLC analysis.

| Sample number | AUC        | DTX concentration |
|---------------|------------|-------------------|
| 1             | 63577833.9 | 15.6              |
| 2             | 113169183  | 31.2              |
| 3             | 201391383  | 62.5              |
| 4             | 359055883  | 125               |
| 5             | 680722583  | 250               |
| 6             | 2554465681 | 1000              |
